# Supplementary material
Source: PubMed Central journal article supplement (PMC10723597)
Supplement: NIHMS1893914-supplement-Supplemental_Material.pdf [file NIHMS1893914-supplement-Supplemental_Material.pdf]

Supplemental Figure 1: Graphical Representations of Exploratory Factor Analysis

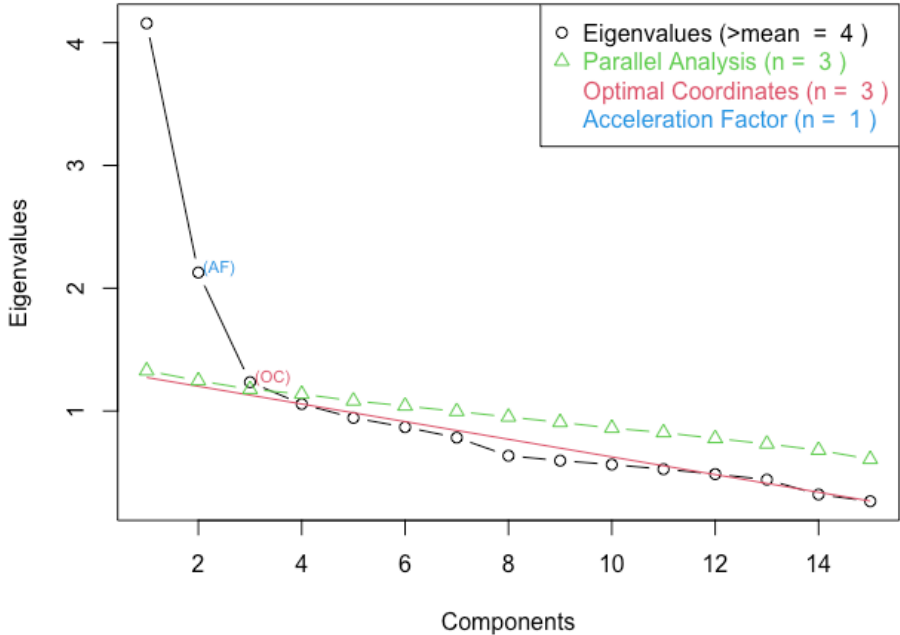

Supplemental Figure 2: Links of Stress to Health by Context

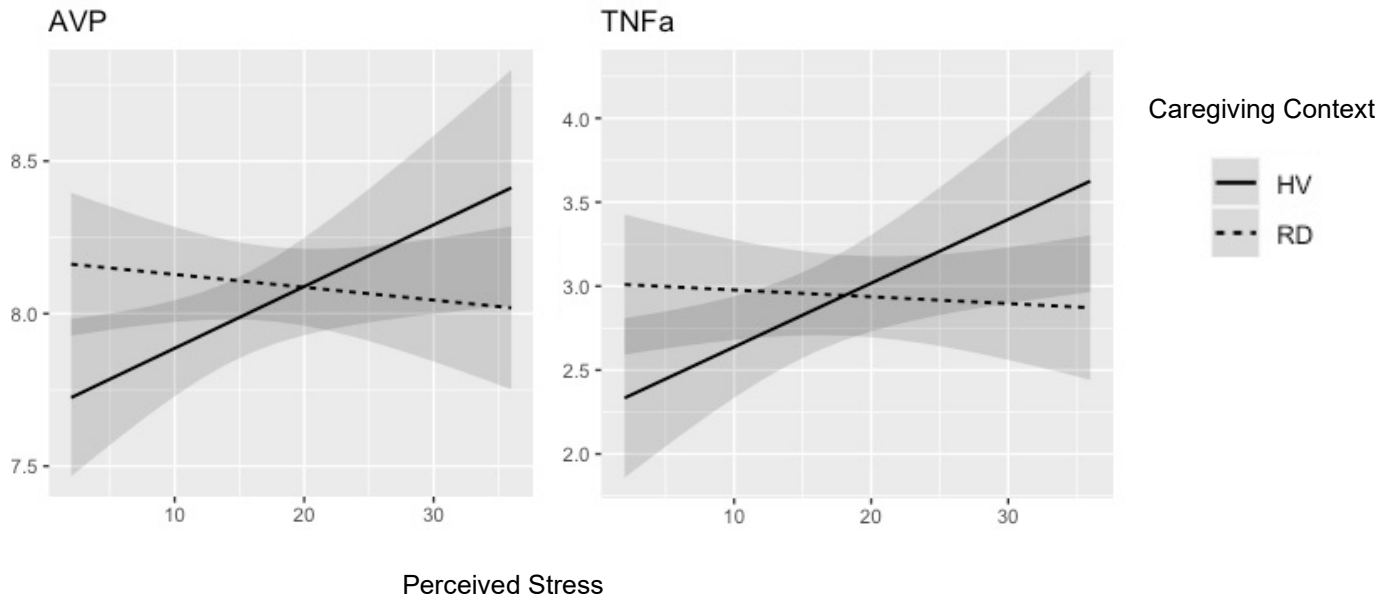

*Note: AVP refers to arginine vasopressin and TNFa refers to tumor necrosis factor alpha. Under caregiving context, HV refers to healthy volunteer or typically developing context; RD refers to rare disease.*

Supplemental Figure 3: Links of Support Coping to Self-Rated Health by Caregiving Context

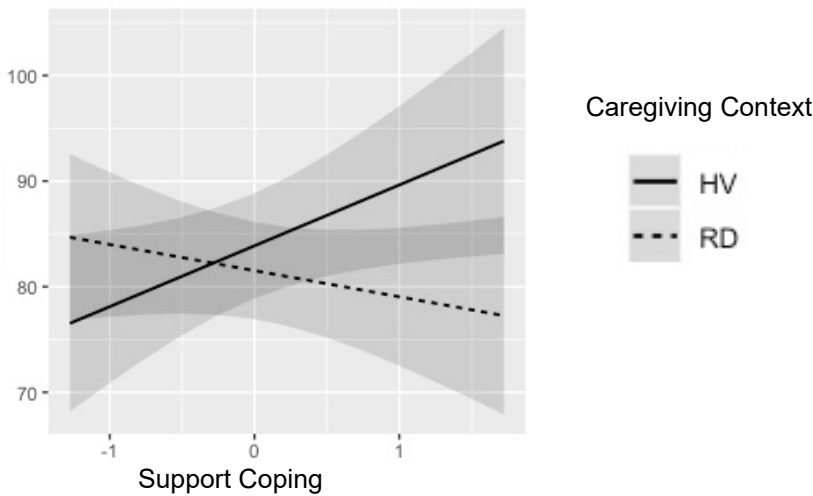

*Note: HV refers to healthy volunteer or typically developing context; RD refers to rare disease.*

Supplemental Figure 4: Moderation of Stress by Proactive Coping to Arginine Vasopressin

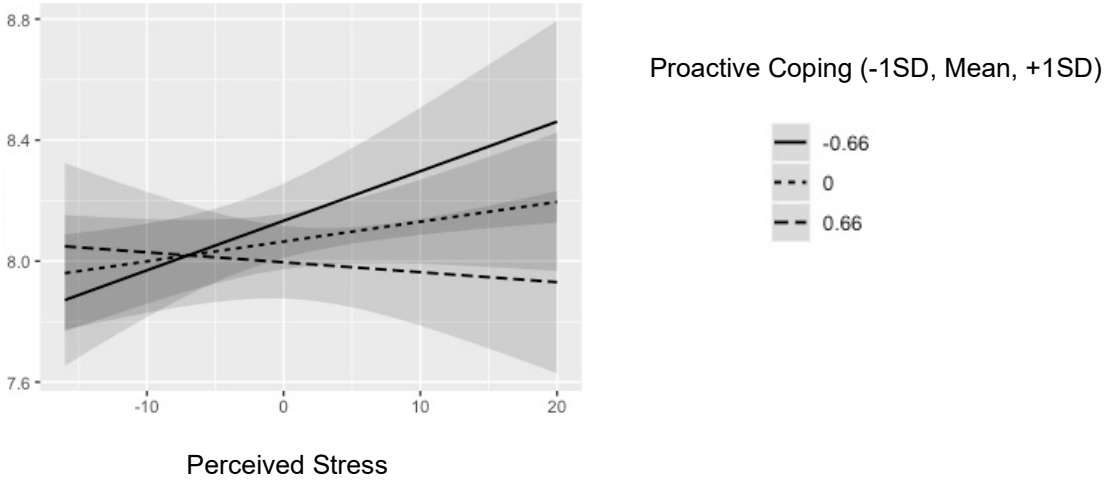

Supplemental Table 1: Demographics for Full Sample

|                                  | Rare and Undiagnosed Diseases<br>(Child <i>n</i> = 142)<br>(Caregiver <i>n</i> = 305) | Typically Developing<br>(Child <i>n</i> = 63)<br>(Caregiver <i>n</i> = 99) | Total<br>(Child <i>n</i> = 205)<br>(Caregiver <i>n</i> = 404) |
|----------------------------------|---------------------------------------------------------------------------------------|----------------------------------------------------------------------------|---------------------------------------------------------------|
| Caregiver Gender (%)             |                                                                                       |                                                                            |                                                               |
| Woman                            | 211 (69.2%)                                                                           | 64 (64.6%)                                                                 | 275 (68.1%)                                                   |
| Man                              | 91 (29.8%)                                                                            | 34 (34.3)                                                                  | 125 (30.9%)                                                   |
| Missing                          | 3 (1.0%)                                                                              | 1 (1.0%)                                                                   | 4 (1.0%)                                                      |
| Care Recipient Gender (%)        |                                                                                       |                                                                            |                                                               |
| Girl                             | 60 (42.3%)                                                                            | 38 (60.3%)                                                                 | 98 (47.8%)                                                    |
| Boy                              | 82 (57.7%)                                                                            | 23 (38.1%)                                                                 | 106 (51.7%)                                                   |
| Missing                          | 0 (0.0%)                                                                              | 1 (1.6%)                                                                   | 1 (0.5%)                                                      |
| Caregiver Age (Mean, SD)         | 44.0 (12.5)                                                                           | 43.1 (11.5)                                                                | 43.8 (12.3)                                                   |
| Care Recipient Age (Mean, SD)    | 10.9 (9.86)                                                                           | 7.62 (4.42)                                                                | 9.88 (8.68)                                                   |
| Education (%)                    |                                                                                       |                                                                            |                                                               |
| Less Than HS                     | 5 (1.6%)                                                                              | 1 (1.0%)                                                                   | 6 (1.5%)                                                      |
| HS Diploma/GED/Technical         | 44 (14.4%)                                                                            | 9 (9.1%)                                                                   | 53 (13.1%)                                                    |
| Some College                     | 62 (20.3%)                                                                            | 17 (17.2%)                                                                 | 79 (19.6%)                                                    |
| Bachelor's Degree                | 113 (37.0%)                                                                           | 28 (28.3%)                                                                 | 141 (34.9%)                                                   |
| Post-Grad Degree                 | 75 (24.6%)                                                                            | 43 (43.4%)                                                                 | 118 (29.2%)                                                   |
| Missing                          | 6 (2.0%)                                                                              | 1 (1.0%)                                                                   | 7 (1.7%)                                                      |
| Marital Status (%)               |                                                                                       |                                                                            |                                                               |
| Married/Cohabiting               | 251 (82.3%)                                                                           | 74 (74.7%)                                                                 | 325 (80.4%)                                                   |
| Not Married                      | 45 (14.8%)                                                                            | 24 (24.2%)                                                                 | 69 (17.1%)                                                    |
| Missing                          | 9 (3.0%)                                                                              | 1 (1.0%)                                                                   | 10 (2.5%)                                                     |
| Relationship to CR (%)           |                                                                                       |                                                                            |                                                               |
| Parent                           | 213 (69.8%)                                                                           | 76 (76.8%)                                                                 | 289 (71.5%)                                                   |
| Grandparent                      | 41 (13.4%)                                                                            | 13 (13.1%)                                                                 | 54 (13.4%)                                                    |
| Other                            | 51 (16.7%)                                                                            | 10 (10.1%)                                                                 | 61 (15.1%)                                                    |
| Caregiver Race/Ethnicity (%)     |                                                                                       |                                                                            |                                                               |
| American Indian/Alaskan Native   | 2 (0.7%)                                                                              | 1 (1.0%)                                                                   | 3 (0.7%)                                                      |
| Asian                            | 9 (3.0%)                                                                              | 13 (13.1%)                                                                 | 22 (5.4%)                                                     |
| Black or African American        | 5 (1.6%)                                                                              | 14 (14.1%)                                                                 | 19 (4.7%)                                                     |
| Native Hawaiian/Pacific Islander | 0 (0%)                                                                                | 1 (1.0%)                                                                   | 1 (0.2%)                                                      |
| Other                            | 14 (4.6%)                                                                             | 8 (8.1%)                                                                   | 22 (5.4%)                                                     |
| White                            | 271 (88.9%)                                                                           | 60 (60.6%)                                                                 | 331 (81.9%)                                                   |
| Missing                          | 4 (1.3%)                                                                              | 2 (2.0%)                                                                   | 6 (1.5%)                                                      |
| Perceived Stress                 | 16.20 (7.43)                                                                          | 13.70 (7.30)                                                               | 15.60 (7.47)                                                  |
| Coping Style                     |                                                                                       |                                                                            |                                                               |
| Proactive Coping                 | 2.61 (.66)                                                                            | 2.30 (.84)                                                                 | 2.54 (.71)                                                    |
| Avoidant Coping                  | 1.62 (.50)                                                                            | 1.59 (.53)                                                                 | 1.62 (.51)                                                    |
| Support Coping                   | 2.29 (.78)                                                                            | 2.20 (.87)                                                                 | 2.27 (.80)                                                    |

Supplemental Table 2. Correlation Matrix of Primary Study Variables

| Variable            | 1                             | 2                          | 3                             | 4                            | 5                             | 6                          | 7                   |
|---------------------|-------------------------------|----------------------------|-------------------------------|------------------------------|-------------------------------|----------------------------|---------------------|
| 1. Stress           |                               |                            |                               |                              |                               |                            |                     |
| 2. Proactive Coping | <b>.28**</b><br>[.13, .41]    |                            |                               |                              |                               |                            |                     |
| 3. Avoidant Coping  | <b>.58**</b><br>[.47, .68]    | <b>.43**</b><br>[.30, .55] |                               |                              |                               |                            |                     |
| 4. Support Coping   | .13<br>[-.03, .27]            | <b>.50**</b><br>[.37, .61] | <b>.20*</b><br>[.05, .34]     |                              |                               |                            |                     |
| 5. log CRP          | .03<br>[-.12, .19]            | -.09<br>[-.24, .07]        | -.01<br>[-.16, .14]           | -.10<br>[-.25, .05]          |                               |                            |                     |
| 6. log TNFa         | .07<br>[-.09, .22]            | -.09<br>[-.24, .06]        | -.05<br>[-.20, .11]           | -.07<br>[-.22, .08]          | .05<br>[-.11, .20]            |                            |                     |
| 7. log AVP          | .11<br>[-.04, .26]            | -.04<br>[-.19, .11]        | .05<br>[-.10, .20]            | <b>-.15*</b><br>[-.30, -.00] | <b>.18*</b><br>[.03, .32]     | <b>.52**</b><br>[.40, .62] |                     |
| 8. SRH              | <b>-.30**</b><br>[-.43, -.15] | -.08<br>[-.23, .07]        | <b>-.30**</b><br>[-.43, -.15] | .01<br>[-.15, .16]           | <b>-.22**</b><br>[-.36, -.07] | .05<br>[-.10, .20]         | -.06<br>[-.21, .09] |

Note. *M* and *SD* are used to represent mean and standard deviation, respectively. Values in square brackets indicate the 95% confidence interval for each correlation. \* indicates  $p < .05$ . \*\* indicates  $p < .01$ .

Supplemental Table 3. Factor Analysis of BriefCope in Caregiving

|                             | Factor 1<br>Proactive Coping | Factor 2<br>Avoidant Coping | Factor 3<br>Support Coping |
|-----------------------------|------------------------------|-----------------------------|----------------------------|
| Acceptance                  | .57*                         | -.08                        | .02                        |
| Active Coping               | .71*                         | .05                         | .04                        |
| Planning                    | .86*                         | .20                         | -.14                       |
| Reframing                   | .53*                         | -.01                        | .09                        |
| Religion                    | .40*                         | -.11                        | .02                        |
| Behavioral Disengagement    | -.05                         | .72*                        | -.18                       |
| Denial                      | -.04                         | .45*                        | -.05                       |
| Distraction                 | .22                          | .50*                        | .07                        |
| Blame                       | .21                          | .67*                        | -.14                       |
| Venting                     | .05                          | .44*                        | .31                        |
| Substance Use               | -.13                         | .38                         | .05                        |
| Humor                       | .03                          | .28                         | .22                        |
| Use of Emotional Support    | -.05                         | -.16                        | .93*                       |
| Use of Instrumental Support | .09                          | -.06                        | .75*                       |

*Note: \* refers to a factor loading of >.40*
